# Supplementary material
Source: publisher figshare collection journal article supplement (https://asha.figshare.com/articles/dataset/_/21714278)
Supplement: Supplementary file 1 [file 1]

## JASP-EMT for Toddlers with ASD Caregiver-Child Interaction (CCX) Code Summaries

### CHILD Code Summary

| <i>Single Codes</i>                                            | <i>Form</i>   | <i>Independence</i> | <i>Function</i>      | <i>JA</i>            | <i>Eye Contact</i> |
|----------------------------------------------------------------|---------------|---------------------|----------------------|----------------------|--------------------|
| [cx] – unintelligible word                                     | [g] – gesture | [u] – unprompted    | [re] – request       | [po] – point         | [ec] – eye contact |
| [s] – scripted speech; vocalization; non-social AAC activation | [w] – word    | [p] – prompted      | [co] – comment       | [sh] – show          |                    |
| [n] – no response                                              | [a] – AAC     | [i] – imitated      | [ot] – other/unknown | [gi] – give          |                    |
| [o] – no opportunity                                           | [z] – sign    | [e] – elicited      |                      | [og] – other gesture |                    |
| [t] – action                                                   | [a] – AAC     |                     |                      |                      |                    |

### ADULT Code Summary

| <i>Single Codes</i>          | <i>Matched Turn</i>   | <i>Expansion</i>            | <i>Target</i>             | <i>JA</i>               |
|------------------------------|-----------------------|-----------------------------|---------------------------|-------------------------|
| [n] – no response            | [mt] – matched turn   | [yx] – expansion            | [at] – at target level    | [ja] – adult uses JA    |
| [o] – no opportunity         | [ut] – unmatched turn | [nx] – no expansion         | [ht] – target with others | [nj] – no adult JA used |
| [ax] – adult unintelligible  | [et] – extra turn     | [ix] – impossible to expand | [xt] – expansion target   |                         |
| [ar] – adult omitted article |                       |                             | [pt] – proximal target    |                         |
|                              |                       |                             | [qt] – question target    |                         |
|                              |                       |                             | [ge] – grammatical error  |                         |
|                              |                       |                             | [ab] – above target level |                         |
|                              |                       |                             | [ct] – command target     |                         |
|                              |                       |                             | [be] – below target level |                         |
|                              |                       |                             | [th] – a linguistic other |                         |
