# Supplementary material
Source: publisher figshare collection journal article supplement (https://asha.figshare.com/articles/dataset/_/21714278)
Supplement: Supplementary file 2 [file 1]

**Supplemental Material S3. Intervention fidelity.**

|                                                               |                                 | <b>Northwestern University</b> | <b>Vanderbilt University</b> | <b>Combined</b>          |
|---------------------------------------------------------------|---------------------------------|--------------------------------|------------------------------|--------------------------|
| Total Intervention Sessions                                   | <i>n</i>                        | 1004                           | 1035                         | 2039                     |
| Total Session Rated for Fidelity                              | <i>n</i> (%)                    | 240 (24%)                      | 201 (19%)                    | 441 (22%)                |
| Sessions Below 80% Fidelity for Therapist Only                | <i>n</i> (%)                    | 5 (2%)                         | 1 (0.5%)                     | 6 (1%)                   |
| Sessions Below 80% Fidelity for Parent Training Only          | <i>n</i> (%)                    | 7 (3%)                         | 28 (14%)                     | 35 (8%)                  |
| Sessions Below 80% Fidelity for Therapist and Parent Training | <i>n</i> (%)                    | 0 (0%)                         | 0 (0%)                       | 0 (0%)                   |
| % Therapist Fidelity Score                                    | <i>M</i> ( <i>SD</i> )<br>Range | 0.95 (0.05)<br>0.76–1.00       | 0.97 (0.04)<br>0.72–1.00     | 0.96 (0.05)<br>0.72–1.00 |
| % Parent Training Fidelity Score                              | <i>M</i> ( <i>SD</i> )<br>Range | 0.94 (0.06)<br>0.69–1.00       | 0.90 (0.10)<br>0.62–1.00     | 0.92 (0.08)<br>0.62–1.00 |
