# Supplementary material
Source: publisher figshare collection journal article supplement (https://asha.figshare.com/articles/dataset/_/21714278)
Supplement: Supplementary file 3 [file 1]

**Supplemental Material S1.** Protocol deviations for intervention and assessment sessions.

| <b>Intervention</b>                   |            | <b>Assessment</b>                   |             |
|---------------------------------------|------------|-------------------------------------|-------------|
| Total Intervention Sessions           | 2039       | Total Assessments Administered      | 2825        |
| Total Number of Protocol Deviations   | 96 (4.71%) | Total Number of Protocol Deviations | 257 (9.10%) |
| Intervention session cut short        | 15 (0.74%) | Out of window assessment visit      | 81 (2.87%)  |
| Missing Video                         | 59 (2.89%) | Missing Data                        | 122 (4.32%) |
| Primary caregiver not present         | 10 (0.49%) | Primary Caregiver not present       | 5 (0.18%)   |
| Alternative location                  | 1 (0.05%)  | Alternative Location                | 3 (0.11%)   |
| Alternative materials used            | 1 (0.05%)  | Alternative Materials Used          | 14 (0.50%)  |
| Other                                 | 10 (0.49%) | Unblind Assessor                    | 7 (0.25%)   |
| Did not complete at least 40 sessions | 5 (8.6%)   | Other                               | 25 (0.88%)  |
