# Supplementary material
Source: publisher figshare collection journal article supplement (https://asha.figshare.com/articles/dataset/_/21714278)
Supplement: Supplementary file 4 [file 1]

## Supplemental Material S2. Adverse events across duration of trial.

| Study Activity    | Adverse Event         | Severity | Study Related? | Details                                                                  |
|-------------------|-----------------------|----------|----------------|--------------------------------------------------------------------------|
| Intervention      | Child aggression      | Mild     | Yes            | 1 session (child was irritable due to being sick)                        |
|                   | Life event for family | Mild     | No             | 1 session (mother received unexpected medical results)                   |
|                   | Child aggression      | Moderate | No             | 1 session (child was unable to take anxiety medication prior to session) |
|                   | Life event for family | Moderate | No             |                                                                          |
| Assessment        | Child aggression      | Moderate | Yes            | 1 session (child was frustrated with testing)                            |
|                   | Life event for family | Moderate | No             | 1 (mother hospitalized)                                                  |
| Non-study context | Life event for family | Severe   | No             | 1 (mother incarcerated)                                                  |
