# Supplementary material
Source: publisher figshare collection journal article supplement (https://asha.figshare.com/articles/dataset/_/21714278)
Supplement: Supplementary file 6 [file 1]

## Language Sample Protocol

A language sample is a naturalistic adult-child interaction with a specific set of toys to evaluate a child’s spontaneous expressive language ability.

### Purpose:

1. A language sample accurately captures a child’s initiated, unprompted language using a 20-minute language sample.
2. A language sample avoids language-rich verbs and labels that may not occur in the child’s natural environment but provides a fun, responsive and engaging environment.

### Materials:

There are 6 toys sets that comprise the language sample:

|                          |                                                                                      |
|--------------------------|--------------------------------------------------------------------------------------|
| 1. Babies                |   |
| 2. Barn, animals, blocks |  |
| 3. Cars with ramp        |  |

4. Playdoh

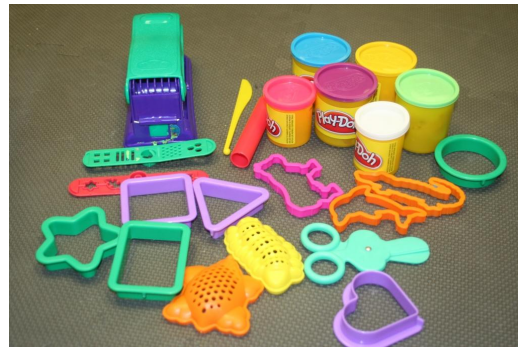

5. Where's Spot?

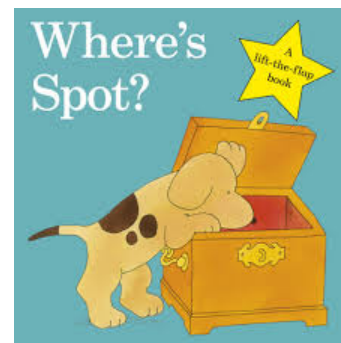

6. Bubbles

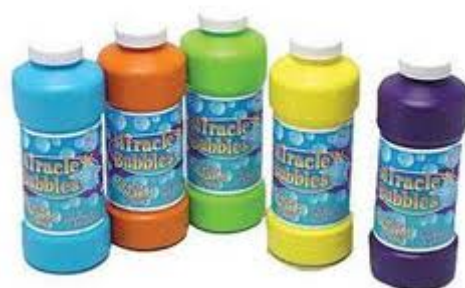

### **Getting Started Procedures:**

1. Have all 6 toy sets available in the room.
  - a. Set up toysets so that they are in the child's line of sight, but contained to maintain room organization and environmental control
2. Start the timer for **20 minutes**.

### **Communication**

3. Be at the child's eye level in close proximity to the child.
4. Use a warm, positive tone of voice and engage with the child.
5. Engage with the child and toys.
  - a. Imitate the child's play acts.
6. **Respond to all child communication** (gesture, vocalization, words):
  - a. Imitate the child's words
    - i. When imitating a word, use a "comment-like" tone rather than a questioning tone (i.e. "train" rather than "train?").
  - b. If the child continues to talk, let the child talk. Repeat what you remember from the long utterance only. **Do not add in words you think you might have heard.**
  - c. Acknowledge nonverbal communication with sounds (e.g., "mhm," "yeah," "uh-huh") but refrain from making too many silly noises (oop! Vroom, numnumnum (eating noise) that the child might begin to over use)
  - d. If the child asks a question: respond with a nonverbal gesture (i.e. point or show). If you are not able to answer nonverbally, then use a brief, positive response (i.e., "I don't know")

### **Play**

7. The child is allowed to choose the toy set he/she wants to play with.
  - a. If the child **does not** choose a toy:
    - i. pick a toy and begin to play with it
    - ii. hand the child part of the toy to play with
    - iii. hold up two toys for the child to choose from
    - iv. encourage the child to sit and interact with a toy
    - v. move the child to the table and help them begin to play
    - vi. remove a distracting toy from the room
  - b. If the child **chooses** a toy:
    - i. Introduce each toy set with the specific Open-ended Milieu Question listed below
8. The adult must attempt to have the child interact with all of the toy sets:
  - a. High priority toys may be cleaned up and put back in the Language Sample bag to help the child move on to a different toy set.
  - b. If removing a toy or moving to different toy set causes behavior issues, you may stay with the preferred toy or you may combine toy sets together.
  - c. Discontinue playing with a toy set if the child loses interest and present a different toy set
  - d. If the child loses interest in the toy sets quickly, some of the toy sets may need to be re-introduced to make it through the 20 minute session.

- e. If you can't get the child to interact with all of the toy sets, to meet the totals required during the LS, additional Time delays and Open-ended Questions may need to be presented within the toy sets the child will play with.
  - i. Open-ended questions that need to be embedded within a preferred toy set rather than as an introduction may be: "Now what should we do?" or "What's next?"
  - ii. Time Delays in which the child Loses Interest (TLI) can count toward the 6 total opportunities, if need be.

### **Things you must do during each toy set**

#### **9. Introduce the toy set with an OPEN QUESTION**

- a. *Here are my **babies**, what should they do?*
- b. *Here are my **animals**, what should they do?*
- c. *Here are my **cars**, where should they go?*
- d. *Here is my **playdoh**, what should we make?*
- e. *Here is my **dog** book, tell me what you see?*
- f. *Here are my **bubbles**, what should I do?*

#### **10. Use 1 Time Delay strategy per toy set.**

Time Delays are a non-verbal strategy. If you do one of the following paired with a verbal prompt – such as asking a question – it does not count as a Time Delay. Do not pair with the open question at the beginning of the toy set.

- a. Set up TD and wait expectantly, for up to 5 seconds, for the child to use a communication attempt (gesture, sign, vocal, or verbal) prior to honoring the request.
- b. The adult must maintain possession of the TD items long enough (tug/resistance) for the child to understand another response is required other than just taking the item from the adult.
- c. If the child loses interest, you may try again, but TLIs can also count toward the 6 total opportunities, if need be.
  - i. Inadequate Portions: providing small or inadequate portions of preferred materials (e.g., give the child only a few pieces of train track).
  - ii. Assistance: creating situations in which the child needs the adult's help (e.g., giving bubble jar to the child with the cap on)
  - iii. Waiting Expectantly: setting up a routine in which the child expects certain actions and then waiting before doing the expected action again (e.g., hold the next page down in the book).
  - iv. Choice Making: holding up two objects and wait for the child to communicate about which item he/she wants (e.g., holding up a doll and a teacup)
- d. There must be a Total of **5** Time Delays in the 20 minute LS.
- e. TD are NOT used during the book. Therapist is to point 4 times instead (without words) to elicit communication.

11. **Model at least 2 new play acts per toy set.** If the child will not engage with all of the toy sets, model extra play acts with the toys that the child will use.
12. **Point to 4 pictures** during book reading. Preferably point to something the child is already interested in to see if he/she will label it.
13. The adult must make at least two statements per minute (one every 30 sec) to maintain engagement. This rate includes the adult's Open-ended, Comments, and Responses to the child's communication. Behavioral or Transition statements do NOT count toward this total. There should never be more than 30 seconds of silence.
  - a. Since there are a lot of built in opportunities, this will only occur when you have completed your open questions, comments, and the child is silent for the 30 seconds.
  - b. When making these statements:
    - i. Use non-specific words you have heard the child use during the Language Sample and limit introducing new vocabulary.
    - ii. Talk in sentences at least 4 words long and, if possible, use non-informational language (e.g. it, that, those instead of nouns): "wow, look what you did with that!" "That looks like so much fun!" "it went all the way over there"
    - iii. Don't finish a statement with a content word that is likely to be imitated/the child has used spontaneously earlier.

**JASP-EMT for Toddlers with ASD**  
**Language Sample Code Summary**

| <i>Single Codes</i>                                                      | <i>Form</i>   | <i>Independence</i> | <i>Function</i>      | <i>Joint Attention</i> | <i>Eye Contact</i> |
|--------------------------------------------------------------------------|---------------|---------------------|----------------------|------------------------|--------------------|
| [cx] – unintelligible word                                               | [g] – gesture | [u] – unprompted    | [re] – request       | [po] - point           | [ec] – eye contact |
| [s] – scripted speech;<br>vocalization;<br>non-social AAC<br>activation; | [w] – word    | [p] – prompted      | [co] – comment       | [sh] – show            |                    |
|                                                                          | [z] – sign    | [i] – imitated      | [ot] – other/unknown | [gi] – give            |                    |
|                                                                          | [a] – AAC     | [e] – elicited      |                      | [og] – other gesture   |                    |
