# Supplementary material
Source: publisher figshare collection journal article supplement (https://asha.figshare.com/articles/dataset/_/21714278)
Supplement: Supplementary file 7 [file 1]

# Time Delay Strategies

## What are Time Delay (TD) Strategies?

- Non-verbal strategies that encourage your child to communicate with you.
  - Inadequate Portions: providing small or inadequate portions of preferred materials.
  - Assistance: creating situations in which the child needs the adult's help.
  - Waiting with Routine: setting up a routine in which the child expects certain actions and then waiting before doing the expected action again.
  - Waiting with Cue: using associated objects (e.g., shoe to foot) and then waiting before completing the expected action.
  - Choice Making: holding up two objects and waiting for the child to communicate about which item he/she wants.

## Why Use TD Strategies?

- Provides the child with more opportunities to practice communicating.
  - Increases the child's rate of communication
- Provides the adult with more opportunities to teach new language by
  - Responding
  - Expanding the child's communication

## How to Use TD Strategies?

- Set up the opportunity to encourage your child to communicate by using an environmental arrangement strategy.
- Wait until your child communicates (gestures, vocalizes, says a word).
- Expand this communication with a target.

## When to Use TD Strategies?

- Use TD Strategies when the child is not communicating frequently (e.g., less than 2 times per minute).
- Some strategies work better than others for different children.
  - Use the ones that work best for the child.
  - Avoid TD strategies that frustrate the child.

# Time Delay Strategies

## Inadequate Portions

- Video Example:
  - What does the adult do to elicit the child's communication?  
\_\_\_\_\_
  - How does the child respond to this time delay strategy?  
\_\_\_\_\_
  - What target does the adult use to expand the child's communication?  
\_\_\_\_\_
- Other examples of inadequate portions:
  - \_\_\_\_\_
  - \_\_\_\_\_
  - \_\_\_\_\_

## Assistance

- Video Example:
  - What does the adult do to elicit the child's communication?  
\_\_\_\_\_
  - How does the child respond to this time delay strategy?  
\_\_\_\_\_
  - What target does the adult use to expand the child's communication?  
\_\_\_\_\_
- Other examples of assistance:
  - \_\_\_\_\_
  - \_\_\_\_\_
  - \_\_\_\_\_

## Waiting with Routine

- Video Example:
  - What does the adult do to elicit the child's communication?  
\_\_\_\_\_
  - How does the child respond to this time delay strategy?  
\_\_\_\_\_
  - What target does the adult use to expand the child's communication?  
\_\_\_\_\_
- Other examples of waiting expectantly as part of a routine:
  - \_\_\_\_\_
  - \_\_\_\_\_
  - \_\_\_\_\_

# Time Delay Strategies

## Waiting with Cue

- Video Example:
  - What does the adult do to elicit the child's communication?  
\_\_\_\_\_
  - How does the child respond to this time delay strategy?  
\_\_\_\_\_
  - What target does the adult use to expand the child's communication?  
\_\_\_\_\_
- Other examples of waiting with cue:
  - \_\_\_\_\_
  - \_\_\_\_\_
  - \_\_\_\_\_

## Choice Making

- Video Example:
  - What does the adult do to elicit the child's communication?  
\_\_\_\_\_
  - How does the child respond to this time delay strategy?  
\_\_\_\_\_
  - What target does the adult use to expand the child's communication?  
\_\_\_\_\_
- Other examples of choice making:
  - \_\_\_\_\_
  - \_\_\_\_\_
  - \_\_\_\_\_

| <b>JASP-EMT Fidelity Checklist: Caregiver Instruction</b>                                                                                    |                                                                           |        |
|----------------------------------------------------------------------------------------------------------------------------------------------|---------------------------------------------------------------------------|--------|
| <i>Intro to Session</i>                                                                                                                      |                                                                           |        |
| Item                                                                                                                                         | Coding                                                                    | Rating |
| Therapist asks the caregiver how intervention has been going at home.                                                                        | 0 = strategy was not used<br>1 = strategy was used                        |        |
| Therapist reviews the day's plan (toys, routines) discussed at the last session with the caregiver.                                          | 0 = strategy was not used<br>1 = strategy was used                        |        |
| Therapist reminds caregiver of the 2 strategies for the day (list below):<br>1)<br>2)                                                        | 0 = no strategy used<br>1 = one strategy used<br>2 = both strategies used |        |
| Therapist reviews the rationale behind each of the two strategies (indicate times below):<br>1)<br>2)                                        | 0 = no strategy used<br>1 = one strategy used<br>2 = both strategies used |        |
| Therapist models or verbally walks through 1 example of each strategy (indicate times below):<br>1)<br>2)                                    | 0 = no strategy used<br>1 = one strategy used<br>2 = both strategies used |        |
| Therapist engages the caregiver in role play or verbal "what if" scenarios to practice use of strategies (indicate times below):<br>1)<br>2) | 0 = no strategy used<br>1 = one strategy used<br>2 = both strategies used |        |
|                                                                                                                                              | <i>Intro to Session</i> subscore                                          |        |

| <i>Play Session</i>                                                                                                                         |                                                                                                                   |        |
|---------------------------------------------------------------------------------------------------------------------------------------------|-------------------------------------------------------------------------------------------------------------------|--------|
| Item                                                                                                                                        | Coding                                                                                                            | Rating |
| Total play session last 30 minutes.                                                                                                         | 0 = No, 1 = Yes                                                                                                   |        |
| Therapist plays for a minimum of 15 minutes and a maximum of 25 minutes (10 must be consecutive).                                           | 0 = No, 1 = Yes                                                                                                   |        |
| Caregiver plays for a minimum of 5 minutes and a maximum of 15 minutes (5 min must be consecutive).                                         | 0 = No, 1 = Yes                                                                                                   |        |
| Therapist highlights modeling targets of the day at least 2 times each:<br>Time/Example:<br>Time/Example:<br>Time/Example:<br>Time/Example: | 0 = No targets modeled<br>1 = 1 target model<br>2 = 2 target models<br>3 = 3 target models<br>4 = 4 target models |        |

|                                                                                                                                                    |                 |  |
|----------------------------------------------------------------------------------------------------------------------------------------------------|-----------------|--|
| Therapist gives caregiver specific positive feedback or training feedback at least one time for every minute of the caregiver session (5 minutes). | 0 = No, 1 = Yes |  |
| Therapist gives feedback about Target1 at least once.<br>Time/Example:                                                                             | 0 = No, 1 = Yes |  |
| Therapist gives feedback about Target2 at least once.<br>Time/Example:                                                                             | 0 = No, 1 = Yes |  |
| <i>Play Session</i> subscore                                                                                                                       |                 |  |

| <i>Interest-Based Routines</i>                                                                                 |                 |        |
|----------------------------------------------------------------------------------------------------------------|-----------------|--------|
| Item                                                                                                           | Coding          | Rating |
| Routines last for a total of 15 min.                                                                           | 0 = No, 1 = Yes |        |
| Therapist discusses how at least one strategy for the day can be carried over into routines:<br>Time/Strategy: | 0 = No, 1 = Yes |        |
| Therapist gives caregiver specific praise or training feedback at least once per routine.<br>Time/Strategy:    | 0 = No, 1 = Yes |        |
| <i>Routines</i> subscore                                                                                       |                 |        |

| <i>Ending Caregiver Training Session</i>                                                                                                                                                                         |                 |        |
|------------------------------------------------------------------------------------------------------------------------------------------------------------------------------------------------------------------|-----------------|--------|
| Item                                                                                                                                                                                                             | Coding          | Rating |
| Therapist summarizes how the caregiver used the target strategies.                                                                                                                                               | 0 = No, 1 = Yes |        |
| Therapist relates one example of caregiver behavior to child behavior.                                                                                                                                           | 0 = No, 1 = Yes |        |
| Therapist engages the caregiver in reflective discussion by using at least 1 probing question, OR, if the caregiver initiates reflective talk, therapist gives reflective feedback in response.<br>Time/Example: | 0 = No, 1 = Yes |        |
| <i>Ending Session</i> subscore                                                                                                                                                                                   |                 |        |

| <b>Total Score</b>                     |  |
|----------------------------------------|--|
| Total Points Earned (sum of subscores) |  |
| Number of Points Excluded              |  |
| Fidelity Percentage                    |  |
