# Supplementary material
Source: publisher figshare collection journal article supplement (https://asha.figshare.com/articles/dataset/_/21714278)
Supplement: Supplementary file 8 [file 1]

## Supplemental Material S4. Baseline characteristics by site.

| Construct                                 | Metric                                  | Intervention                  |                             |                          | Control                       |                             |                          | Comparisons        |                     |
|-------------------------------------------|-----------------------------------------|-------------------------------|-----------------------------|--------------------------|-------------------------------|-----------------------------|--------------------------|--------------------|---------------------|
|                                           |                                         | Northwestern<br><i>n</i> = 30 | Vanderbilt<br><i>n</i> = 28 | Overall<br><i>N</i> = 58 | Northwestern<br><i>n</i> = 30 | Vanderbilt<br><i>n</i> = 32 | Overall<br><i>N</i> = 62 | Between<br>Site ES | Between<br>Group ES |
| Child age                                 | Months                                  | 31.15 (4.47)                  | 31.84 (4.49)                | 31.48 (4.45)             | 32.78 (3.99)                  | 30.78 (3.76)                | 31.75 (3.97)             | <i>d</i> = 0.17    | <i>d</i> = 0.06     |
| Biological Sex                            | Male                                    | 23 (77%)                      | 20 (71%)                    | 43 (74%)                 | 24 (80%)                      | 25 (78%)                    | 49 (79%)                 | <i>rr</i> = 1.15   | <i>rr</i> = 1.23    |
| Participating Caregiver                   | Mother                                  | 24 (80%)                      | 27 (100%)                   | 51 (88%)                 | 23 (77%)                      | 29 (91%)                    | 52 (84%)                 | <i>rr</i> = 4.26*  | <i>rr</i> = 1.53    |
|                                           | Father                                  | 6 (20%)                       | -                           | 6 (12%)                  | 7 (23%)                       | 3 (9%)                      | 10 (16%)                 |                    |                     |
| Age of caregiver                          | Years                                   | 34.85 (5.68)                  | 33.30 (6.10)                | 34.14 (5.88)             | 36.42 (4.23)                  | 33.36 (4.13)                | 34.84 (4.42)             | <i>d</i> = 0.46*   | <i>d</i> = 0.14     |
| Caregivers education                      | Less than HS                            | 1 (3%)                        | 0 (0%)                      | 1 (2%)                   | 0 (0%)                        | 0 (0%)                      | 0 (0%)                   | <i>V</i> = 0.19    | <i>V</i> = 0.01     |
|                                           | HS grad                                 | 2 (7%)                        | 3 (12%)                     | 5 (9%)                   | 3 (10%)                       | 3 (9%)                      | 6 (10%)                  |                    |                     |
|                                           | Special training                        | 2 (7%)                        | 0 (0%)                      | 2 (4%)                   | 3 (10%)                       | 1 (3%)                      | 4 (6%)                   |                    |                     |
|                                           | Some college                            | 8 (28%)                       | 9 (36%)                     | 17 (31%)                 | 7 (23%)                       | 12 (38%)                    | 19 (31%)                 |                    |                     |
|                                           | College grad                            | 5 (17%)                       | 8 (32%)                     | 13 (24%)                 | 6 (20%)                       | 9 (28%)                     | 15 (24%)                 |                    |                     |
|                                           | Graduate degree                         | 11 (38%)                      | 5 (20%)                     | 16 (30%)                 | 11 (37%)                      | 7 (22%)                     | 18 (29%)                 |                    |                     |
| Employment status of parent trained N (%) | Not employed                            | 17 (63%)                      | 16 (62%)                    | 33 (62%)                 | 13 (50%)                      | 18 (56%)                    | 31 (53%)                 | <i>V</i> = 0.04    | <i>V</i> = 0.12     |
|                                           | Part time                               | 3 (11%)                       | 2 (8%)                      | 5 (9%)                   | 5 (19%)                       | 5 (16%)                     | 10 (17%)                 |                    |                     |
|                                           | Full time                               | 7 (26%)                       | 7 (27%)                     | 14 (26%)                 | 7 (27%)                       | 9 (28%)                     | 16 (28%)                 |                    |                     |
|                                           | Second job                              | 0 (0%)                        | 1 (4%)                      | 1 (2%)                   | 1 (4%)                        | 0 (0%)                      | 1 (2%)                   |                    |                     |
| Income                                    | < \$30,000                              | 3 (13%)                       | 3 (13%)                     | 6 (13%)                  | 6 (23%)                       | 1 (4%)                      | 7 (14%)                  | <i>V</i> = 0.24    | <i>V</i> = 0.03     |
|                                           | \$30,000–\$50,000                       | 5 (22%)                       | 3 (13%)                     | 8 (17%)                  | 4 (15%)                       | 5 (22%)                     | 9 (18%)                  |                    |                     |
|                                           | \$50,000–\$100,000                      | 7 (30%)                       | 14 (61%)                    | 21 (46%)                 | 10 (38%)                      | 12 (52%)                    | 22 (45%)                 |                    |                     |
|                                           | > \$100,000                             | 8 (35%)                       | 3 (13%)                     | 11 (24%)                 | 6 (23%)                       | 5 (22%)                     | 11 (22%)                 |                    |                     |
| Bilingual                                 | Monolingual                             | 12 (41%)                      | 15 (60%)                    | 27 (50%)                 | 10 (33%)                      | 21 (68%)                    | 31 (51%)                 | <i>rr</i> = 1.76*  | <i>rr</i> = 1.02    |
|                                           | Spanish                                 | 9 (31%)                       | 6 (24%)                     | 15 (28%)                 | 9 (30%)                       | 3 (10%)                     | 12 (20%)                 |                    |                     |
|                                           | Other                                   | 8 (8%)                        | 4 (16%)                     | 12 (22%)                 | 11 (37%)                      | 7 (22%)                     | 18 (30%)                 |                    |                     |
| Race                                      | American Indian                         | 1 (3%)                        | 0 (0%)                      | 1 (2%)                   | 1 (3%)                        | 0 (0%)                      | 1 (2%)                   | <i>rr</i> = 1.56*  | <i>rr</i> = 1.17    |
|                                           | Asian                                   | 4 (14%)                       | 1 (4%)                      | 5 (9%)                   | 9 (30%)                       | 3 (9%)                      | 12 (19%)                 |                    |                     |
|                                           | Black                                   | 2 (7%)                        | 2 (8%)                      | 4 (8%)                   | 3 (10%)                       | 2 (6%)                      | 5 (8%)                   |                    |                     |
|                                           | White                                   | 16 (55%)                      | 15 (63%)                    | 31 (58%)                 | 9 (30%)                       | 22 (69%)                    | 31 (50%)                 |                    |                     |
|                                           | More than one                           | 0 (0%)                        | 4 (17%)                     | 4 (8%)                   | 6 (20%)                       | 4 (13%)                     | 10 (16%)                 |                    |                     |
|                                           | Others                                  | 0 (0%)                        | 2 (8%)                      | 2 (4%)                   | 0 (0%)                        | 0 (0%)                      | 0 (0%)                   |                    |                     |
|                                           | No response                             | 6 (21%)                       | 0 (0%)                      | 6 (11%)                  | 2 (7%)                        | 1 (3%)                      | 3 (5%)                   |                    |                     |
| Ethnicity                                 | Hispanic                                | 12 (41%)                      | 7 (27%)                     | 19 (35%)                 | 8 (27%)                       | 6 (19%)                     | 14 (23%)                 | <i>rr</i> = 1.18   | <i>rr</i> = 1.21    |
|                                           | Non-Hispanic                            | 15 (52%)                      | 18 (69%)                    | 33 (60%)                 | 22 (73%)                      | 24 (75%)                    | 46 (74%)                 |                    |                     |
|                                           | No response                             | 2 (7%)                        | 1 (4%)                      | 3 (5%)                   | 0 (0%)                        | 2 (6%)                      | 2 (3%)                   |                    |                     |
| ADOS                                      | Comparison Score                        | 8.90 (1.21)                   | 6.89 (2.35)                 | 7.93 (2.09)              | 8.27 (1.41)                   | 7.38 (2.43)                 | 7.81 (2.04)              | <i>d</i> = 0.74*   | <i>d</i> = −0.06    |
| Child use of spoken language              | ADOS score of 3–4 (non-verbal) on A1    | 7 (23%)                       | 9 (32%)                     | 16 (28%)                 | 8 (27%)                       | 10 (31%)                    | 18 (29%)                 | <i>rr</i> = 1.10   | <i>rr</i> = 1.02    |
|                                           |                                         | 23 (77%)                      | 19 (68%)                    | 42 (72%)                 | 22 (73%)                      | 22 (69%)                    | 44 (71%)                 |                    |                     |
| Mullen                                    | T score                                 | 27.33 (11.76)                 | 26.27 (8.3)                 | 26.84 (10.22)            | 24.87 (7.41)                  | 29.94 (12.43)               | 27.44 (10.5)             | <i>d</i> = −0.21   | <i>d</i> = 0.06     |
| RBS-R                                     | Overall Score                           | 22.24 (15.77)                 | 28.37 (17.45)               | 25.2 (16.73)             | 15.9 (12.3)                   | 23.61 (15.92)               | 19.88 (14.69)            | <i>d</i> = −0.43*  | <i>d</i> = −0.34    |
| CBCL                                      | Total T score                           | 57.5 (11.71)                  | 60.62 (9.61)                | 59.00 (10.77)            | 53.62 (11.82)                 | 57.66 (10.01)               | 55.74 (11.00)            | <i>d</i> = −0.32   | <i>d</i> = −0.30    |
| Community therapy                         | Hours                                   | 4.21 (6.41)                   | 3.38 (3.86)                 | 3.8 (5.31)               | 4.52 (5.10)                   | 4.17 (3.19)                 | 4.34 (4.19)              | <i>d</i> = 0.12    | <i>d</i> = 0.11     |
| Caregiver use of strategies               | % Matched Turns                         | 0.18 (0.11)                   | 0.25 (0.15)                 | 0.21 (0.13)              | 0.16 (0.1)                    | 0.27 (0.16)                 | 0.22 (0.14)              | <i>d</i> = −0.72*  | <i>d</i> = 0.06     |
|                                           | % Responsiveness                        | 0.94 (0.10)                   | 0.94 (0.14)                 | 0.94 (0.12)              | 0.94 (0.12)                   | 0.95 (0.08)                 | 0.95 (0.10)              | <i>d</i> = −0.06   | <i>d</i> = 0.04     |
|                                           | % Matched Response                      | 0.69 (0.17)                   | 0.73 (0.19)                 | 0.71 (0.18)              | 0.70 (0.20)                   | 0.75 (0.21)                 | 0.73 (0.20)              | <i>d</i> = −0.26   | <i>d</i> = 0.10     |
|                                           | % Expansions                            | 0.06 (0.13)                   | 0.11 (0.11)                 | 0.08 (0.12)              | 0.14 (0.15)                   | 0.10 (0.18)                 | 0.12 (0.17)              | <i>d</i> = −0.01   | <i>d</i> = 0.22     |
|                                           | % Language Target                       | 0.08 (0.06)                   | 0.09 (0.07)                 | 0.08 (0.06)              | 0.09 (0.06)                   | 0.11 (0.11)                 | 0.10 (0.09)              | <i>d</i> = −0.26   | <i>d</i> = 0.21     |
|                                           | % Time Delays                           | 0.03 (0.15)                   | 0 (0)                       | 0.01 (0.11)              | 0.11 (0.32)                   | 0.02 (0.09)                 | 0.06 (0.23)              | <i>d</i> = 0.32    | <i>d</i> = 0.26     |
|                                           | % Prompts                               | 0.05 (0.15)                   | .07 (0.17)                  | 0.06 (0.16)              | 0.03 (0.09)                   | 0.13 (0.31)                 | 0.08 (0.24)              | <i>d</i> = −0.32   | <i>d</i> = 0.11     |
| Child social communication                | Communicative acts from language sample | 18.7 (24.6)                   | 28.96 (40.71)               | 23.66 (33.46)            | 19.37 (24.21)                 | 23.62 (22.72)               | 21.56 (23.36)            | <i>d</i> = −0.25   | <i>d</i> = −0.07    |
| Child communication                       | CSBS overall weighted score             | 32.90 (20.73)                 | 47.67 (35.15)               | 39.58 (28.86)            | 41.93 (27.13)                 | 42.23 (36.10)               | 42.08 (31.81)            | <i>d</i> = −0.24   | <i>d</i> = 0.08     |
| Expressive vocabulary                     | MCDI total words said                   | 31.7 (63.14)                  | 55.61 (85.54)               | 43.24 (75.1)             | 48 (73.47)                    | 37.84 (60.88)               | 42.76 (66.9)             | <i>d</i> = −0.09   | <i>d</i> = −0.01    |
| Expressive Lang                           | PLS-AC Raw Score                        | 21.33 (4.38)                  | 22.08 (5.99)                | 21.68 (5.15)             | 22.77 (4.39)                  | 21.03 (5.51)                | 21.89 (5.03)             | <i>d</i> = 0.11    | <i>d</i> = 0.04     |
| Receptive Lang                            | PLS-EC Raw Score                        | 18.37 (4.07)                  | 21.35 (5.68)                | 19.75 (5.06)             | 19.93 (4.53)                  | 21.71 (6.58)                | 20.84 (5.69)             | <i>d</i> = −0.45*  | <i>d</i> = 0.20     |
| Play skills                               | SPA highest play level                  | 11.9 (16.77)                  | 8.35 (4.03)                 | 10.22 (12.51)            | 9.63 (3.37)                   | 9.32 (4.37)                 | 9.48 (3.88)              | <i>d</i> = 0.21    | <i>d</i> = −0.08    |
| Autism Core Symptoms                      | BOSCC Total Score                       | 41.82 (7.21)                  | 36.52 (10.02)               | 39.36 (8.95)             | 38.19 (8.21)                  | 36.57 (11.43)               | 37.36 (9.93)             | <i>d</i> = 0.37*   | <i>d</i> = −0.21    |

Note. For between group effect sizes (NU-VU). \**p* < .05.
